# Supplementary material for: Modelling the benefits of an optimised treatment strategy for 5-ASA in mild-to-moderate ulcerative colitis
Source: PubMed Central journal article supplement — BMJ Open Gastroenterol. 2022 Feb 14;9(1):e000853. doi: 10.1136/bmjgast-2021-000853 (PMC8845184; doi:10.1136/bmjgast-2021-000853), 2022-02-14
Supplement: bmjgast-2021-000853supp001.pdf [file bmjgast-2021-000853supp001.pdf]

**SUPPLEMENTARY TABLES**

Supplementary Table 1 Efficacy inputs for induction phase

| Treatment                               | Dose                | Length of course | Population | Remission rate | Reference                                        |
|-----------------------------------------|---------------------|------------------|------------|----------------|--------------------------------------------------|
| Clinical remission (base case analysis) |                     |                  |            |                |                                                  |
| Rectal 5-ASA                            | 1g/d                | 4–8 weeks        | Distal UC  | 59.8%          | Zhao et al. 2017[1]                              |
| Topical budesonide                      | 2–2.3mg/d           | 4–8 weeks        | Distal UC  | 38.1%          | Zhao et al. 2017[1]                              |
| Topical prednisolone                    | 20–25mg/d           | 4–8 weeks        | Distal UC  | 43.5%          | Zhao et al. 2017[1]                              |
| Oral 5-ASA                              | 2–2.9g/d            | 6–12 weeks       | UC         | 26.7%          | Murray et al. 2020[2]                            |
| Oral 5-ASA                              | ≥3g/d               | 6–12 weeks       | UC         | 32.5%          | Murray et al. 2020[2]                            |
| Rectal 5-ASA + Oral 5-ASA               | 1g/d<br>2–2.4g/d    | 6–8 weeks        | UC         | 35.5%          | Calculated from studies in Murray et al. 2020[2] |
| Rectal 5-ASA + Oral 5-ASA               | 1g/d<br>4–4.8g/d    | 6–8 weeks        | UC         | 46.2%          | Calculated from studies in Murray et al. 2020[2] |
| Budesonide MMX                          | 9mg/d               | 8 weeks          | UC         | 26.3%          | Sherlock et al. 2015[3]                          |
| BDP*                                    | 5mg/d               | 4 weeks          | UC         | 34.8%          | Manguso et al. 2016[4]                           |
| Prednisolone                            | 40mg/d <sup>†</sup> | 4 weeks          | UC         | 21.4%          | Manguso et al. 2016[4]                           |
| Combined remission (scenario analysis)  |                     |                  |            |                |                                                  |
| Oral 5-ASA                              | 2–2.9g/d            | 6–12 weeks       | UC         | 37.1%          | Barberio et al. 2021[5]                          |
| Oral 5-ASA                              | ≥3g/d               | 6–12 weeks       | UC         | 39.8%          | Barberio et al. 2021[5]                          |

|                              |                  |           |    |       |                                                                                |
|------------------------------|------------------|-----------|----|-------|--------------------------------------------------------------------------------|
| Rectal 5-ASA<br>+ Oral 5-ASA | 1g/d<br>2–2.4g/d | 6–8 weeks | UC | 49.3% | Treatment effect from Murray et al. 2020[2] applied to Barberio et al. 2021[5] |
| Rectal 5-ASA<br>+ Oral 5-ASA | 1g/d<br>4–4.8g/d | 6–8 weeks | UC | 56.6% | Treatment effect from Murray et al. 2020[2] applied to Barberio et al. 2021[5] |
| Budesonide<br>MMX            | 9mg/d            | 8 weeks   | UC | 15.4% | Sherlock et al. 2015[3]                                                        |

\*BDP data was used to supplement limited data on prednisolone, as clinical trial showed equivalence between these treatments[4,6] †Maximum dose, tapered by 10mg every 14 days

Supplementary Table 2 Efficacy inputs for maintenance phase

| Treatment                    | Dose                  | Timepoint   | Population | Relapse rate | Reference                                                              |
|------------------------------|-----------------------|-------------|------------|--------------|------------------------------------------------------------------------|
| Rectal 5-ASA                 | 0.5–2g/d              | 6–24 months | UC         | 31.5%        | Barberio et al. 2021[5]                                                |
| Oral 5-ASA                   | 2.4–3g/d              | 6–24 months | UC         | 37.2%        | Barberio et al. 2021[5]                                                |
| Oral 5-ASA                   | 4–4.8g/d              | 6–24 months | UC         | 30.4%        | Barberio et al. 2021[5]                                                |
| Oral 5-ASA +<br>FC           | 2–2.4g/d<br>4–4.8g/d* | 18 months   | UC         | 26.2%        | Treatment effect from Lason 2015[7] applied to Barberio et al. 2021[5] |
| Rectal 5-ASA<br>+ Oral 5-ASA | 2–8g/w<br>1.6–3g/d    | 6–24 months | UC         | 24.8%        | Barberio et al. 2021[5]                                                |

\*Escalated dose when triggered by FC levels

Supplementary Table 3 Treatment acquisition costs

| Treatment              | Dose                        | Length of course | Cost per unit | Size of unit | Cost per dose | Doses per course | Cost per course |
|------------------------|-----------------------------|------------------|---------------|--------------|---------------|------------------|-----------------|
| <i>Induction</i>       |                             |                  |               |              |               |                  |                 |
| 5-ASA suppository      | 1g/d                        | 8 weeks          | £0.99         | 1g           | £0.99         | 56               | £55.29          |
| 5-ASA enema            | 1g/d                        | 8 weeks          | £2.53         | 1g           | £2.53         | 56               | £141.84         |
| 5-ASA foam             | 1g/d                        | 8 weeks          | £2.16         | 1g           | £2.16         | 56               | £120.68         |
| Topical budesonide     | 2mg/d                       | 8 weeks          | £4.08         | 2mg (foam)   | £4.08         | 56               | £228.44         |
| Topical prednisolone   | 20mg/d                      | 8 weeks          | £13.36        | 20mg (foam)  | £13.36        | 56               | £748.00         |
| Oral 5-ASA (low dose)  | 2g/d                        | 8 weeks          | £1.23         | 2g           | £1.23         | 56               | £68.86          |
| Oral 5-ASA (high dose) | 4g/d                        | 8 weeks          | £1.23         | 2g           | £2.46         | 56               | £137.72         |
| Budesonide MMX         | 9mg/d                       | 8 weeks          | £2.50         | 9mg          | £2.50         | 56               | £140.00         |
| Oral prednisolone      | 30 mg/d                     | 4 weeks          | £0.04         | 5mg          | £0.23         | 28               | £6.48           |
| 6-mercaptopurine       | 1.5mg/kg/d oral             | 12 weeks         | £0.38         | 50mg         | £1.13         | 84               | £94.95          |
| Azathioprine           | 2.5mg/kg/d IV               | 12 weeks         | £0.03         | 50mg         | £0.12         | 84               | £10.20          |
| Tacrolimus             | 0.1 mg/kg/d oral            | 8 weeks          | £1.11         | 1mg          | £8.91         | 56               | £498.89         |
| Ciclosporin            | 2 mg/kg IV for 7 days       | 12 weeks         | £2.32         | 50mg         | £9.29         | 7                | £65.04          |
| Infliximab             | 5 mg/kg at w0, w2 and w6 IV | 8 weeks          | £377.00       | 100mg        | £1,508.00     | 3                | £4,524.00       |
| Adalimumab             | 160/80/40 mg 14d SC         | 8 weeks          | £316.80       | 40mg         | £316.80       | 8                | £2,534.40       |
| Golimumab              | 200/100 mg 14d SC           | 6 weeks          | £762.97       | 50mg         | £1,525.94     | 3                | £4,577.82       |
| <i>Maintenance</i>     |                             |                  |               |              |               |                  |                 |
| 5-ASA suppository      | 3g/w                        | 52 weeks         | £0.99         | 1g           | £2.96         | 52               | £154.02         |
| 5-ASA enema            | 3g/w                        | 52 weeks         | £2.53         | 1g           | £7.60         | 52               | £395.13         |
| 5-ASA foam             | 3g/w                        | 52 weeks         | £2.16         | 1g           | £6.47         | 52               | £336.18         |
| Oral 5-ASA (low dose)  | 2g/d                        | 52 weeks         | £1.23         | 2g           | £1.23         | 364              | £447.60         |
| Oral 5-ASA (high dose) | 4g/d                        | 52 weeks         | £1.23         | 2g           | £2.46         | 364              | £895.20         |

All treatment costs were taken as the lowest displayed 'NHS indicative price' on BNF website for required dosing of each treatment[8]

Supplementary Table 4 Treatment administration costs

| Method                                                                       | Cost per unit | Source                                                                              |
|------------------------------------------------------------------------------|---------------|-------------------------------------------------------------------------------------|
| IV administration (single outpatient appointment, as modelled in NICE TA329) | £145.33       | Gastroenterology outpatient appointment cost from National Schedule of NHS costs[9] |
| SC self-administration training                                              | £27.78        | 30 mins with Band 6 hospital nurse, PSSRU[10]                                       |
| Cost of FC home test (first test with training)                              | £71.50        | NICE, MIB132.[11]                                                                   |
| Cost of FC home test (subsequent tests)                                      | £53.38        |                                                                                     |

FC: faecal calprotectin

Supplementary Table 5 Treatment course costs model inputs

| Treatment                                                                     | Cost per course |
|-------------------------------------------------------------------------------|-----------------|
| <i>Induction</i>                                                              |                 |
| Topical 5-ASA (average of suppository, enema and foam costs)                  | £105.94         |
| Topical budesonide                                                            | £228.44         |
| Oral 5-ASA (low dose)                                                         | £68.86          |
| Oral 5-ASA (high dose)                                                        | £137.72         |
| Combined 5-ASA low dose (oral plus topical costs)                             | £174.80         |
| Combined 5-ASA high dose (oral plus topical costs)                            | £243.66         |
| Topical steroids or low dose combined (oral plus topical 5-ASA/steroid costs) | £205.42         |
| Budesonide MMX                                                                | £140.00         |
| Oral prednisolone                                                             | £6.48           |
| 6-mercaptopurine                                                              | £94.95          |
| Azathioprine                                                                  | £10.20          |
| Tacrolimus                                                                    | £498.89         |
| Ciclosporin                                                                   | £1,082.35       |
| Mixed therapies (average of 6-MP, azathioprine, tacrolimus & ciclosporin)     | £2,232.10       |
| Infliximab                                                                    | £4,959.99       |
| Adalimumab                                                                    | £2,562.18       |
| Golimumab                                                                     | £4,605.60       |
| Anti-TNF (average of infliximab, adalimumab & golimumab)                      | £4,042.59       |
| <i>Maintenance</i>                                                            |                 |
| Rectal 5-ASA (average of suppository, enema and foam costs)                   | £295.11         |
| Low dose oral 5-ASA                                                           | £447.60         |
| Low dose oral 5-ASA + FC (FC test every three months)                         | £679.24         |
| High dose oral 5-ASA                                                          | £895.20         |
| Combined 5-ASA (oral plus topical costs)                                      | £1,190.31       |

Supplementary Table 6 Modelled treatment cost results

|                                                      | Number of patients                   |                         | Cost                  |
|------------------------------------------------------|--------------------------------------|-------------------------|-----------------------|
| <i>Induction phase</i>                               |                                      |                         |                       |
| Oral steroids avoided by optimisation                | 1,840                                |                         | £11,923.20            |
| Advanced therapies avoided by optimisation           | 1,323                                |                         | £5,348,346.57         |
| <b>TOTAL COSTS AVOIDED</b>                           |                                      |                         | <b>£5,360,269.77</b>  |
| Additional high dose combined 5-ASA in optimised arm | 5,725                                |                         | £1,285,304.16         |
| Additional optimised oral steroids in optimised arm  | 3,798                                |                         | £531,720.00           |
| <b>TOTAL ADDITIONAL COSTS</b>                        |                                      |                         | <b>£1,817,024.16</b>  |
| <b>NET COST</b>                                      |                                      |                         | <b>-£3,543,245.61</b> |
| <b>Net cost per patient</b>                          |                                      |                         | <b>-£354.32</b>       |
| <i>Maintenance phase</i>                             |                                      |                         |                       |
|                                                      | <b>Number completing full course</b> | <b>Number relapsed*</b> | <b>Cost</b>           |
| Rectal 5-ASA in standard arm                         | 1,578                                | 726                     | £572,808.33           |
| Low dose oral 5-ASA in standard arm                  | 2,676                                | 1,585                   | £1,552,495.98         |
| <b>Total cost in standard arm</b>                    |                                      |                         | <b>£2,125,304.30</b>  |
| Rectal 5-ASA in optimised arm                        | 1,204                                | 554                     | £437,057.77           |
| Low dose oral 5-ASA + FC in optimised arm            | 2,189                                | 778                     | £1,758,125.96         |
| High dose oral 5-ASA in optimised arm                | 526                                  | 230                     | £573,821.49           |
| Combined 5-ASA in optimised arm                      | 815                                  | 269                     | £1,130,196.72         |
| <b>Total cost in optimised arm</b>                   |                                      |                         | <b>£3,899,201.94</b>  |
| <b>NET ADDITIONAL COST</b>                           |                                      |                         | <b>£1,773,897.64</b>  |
| <i>Re-induction of remission</i>                     |                                      |                         |                       |
|                                                      | <b>Number of patients</b>            |                         |                       |
| Rectal 5-ASA avoided by optimisation                 | 30                                   |                         | £3,178.11             |
| Topical steroids or low dose combined                | 12                                   |                         | £2,465.09             |
| Low dose combined                                    | 450                                  |                         | £78,659.20            |
| Oral steroids                                        | 297                                  |                         | £1,924.56             |
| Advanced therapies                                   | 214                                  |                         | £865,114.26           |
| <b>TOTAL COSTS AVOIDED</b>                           |                                      |                         | <b>£951,341.21</b>    |
| <b>NET COST</b>                                      |                                      |                         | <b>£822,556.43</b>    |
| <b>Net cost per patient entering maintenance</b>     |                                      |                         | <b>£125.29</b>        |
| <i>Combined induction and maintenance</i>            |                                      |                         |                       |
| <b>NET COST</b>                                      |                                      |                         | <b>-£2,720,689.18</b> |
| <b>Net cost per patient</b>                          |                                      |                         | <b>-£272.07</b>       |

\*Relapsed patients assumed to require an average of 6 months therapy (based on the assumption that relapse rate was linear over time)

## REFERENCES

1. Zhao X, Zhou C, Ma J, et al. Efficacy and safety of rectal 5-aminosalicylic acid versus corticosteroids in active distal ulcerative colitis: A systematic review and network meta-analysis. *Sci Rep* 2017;7:46693.
2. Murray A, Nguyen TM, Parker CE, et al. Oral 5-aminosalicylic acid for induction of remission in ulcerative colitis. *Cochrane Database Syst Rev* 2020;8:CD000543.
3. Sherlock ME, MacDonald JK, Griffiths AM, et al. Oral budesonide for induction of remission in ulcerative colitis. *Cochrane Database Syst Rev* 2015;10:CD007698.
4. Manguso F, Bennato R, Lombardi G, et al. Efficacy and safety of oral beclomethasone dipropionate in ulcerative colitis: A Systematic review and meta-analysis. *PLoS One* 2016;11(11):e0166455.
5. Barberio B, Segal JP, Quraishi MN, et al. Efficacy of Oral, Topical, or Combined Oral and Topical 5-Aminosalicylates, in Ulcerative Colitis: Systematic Review and Network Meta-Analysis. *J Crohns Colitis* 2021;15(7):1184–96.
6. Van Assche G, Manguso F, Zibellini M, et al. Oral prolonged release beclomethasone dipropionate and prednisone in the treatment of active ulcerative colitis: Results from a double-blind, randomized, parallel group study. *Am J Gastroenterol* 2015;110(5):708–15.
7. Lasson A, Öhman L, Stotzer P-O, et al. Pharmacological intervention based on fecal calprotectin levels in patients with ulcerative colitis at high risk of a relapse: A prospective, randomized, controlled study. *United European Gastroenterol J* 2015;3(1):72–9.
8. BNF, 2022. National Institute for Health and Care Excellence. Available at: <https://bnf.nice.org.uk/> [Accessed January 2022].
9. National Cost Collection: National Schedule of NHS costs - Year 2019–20. NHS England. Available at: <https://www.england.nhs.uk/national-cost-collection/> [Accessed January 2022].
10. Curtis LA, Burns A. Unit Costs of Health & Social Care 2020. PSSRU, University of Kent, 2020. DOI: 10.22024/UniKent/01.02.84818
11. Point-of-care and home faecal calprotectin tests for monitoring treatment response in inflammatory bowel disease (MIB132). National Institute for Health and Care Excellence. Available at: [www.nice.org.uk/guidance/mib132](http://www.nice.org.uk/guidance/mib132) [Accessed January 2022].
